# Supplementary material for: Inhibition of Lon protease by triterpenoids alters mitochondria and is associated to cell death in human cancer cells
Source: PubMed Central journal article supplement (PMC4694845; doi:10.18632/oncotarget.4510), 2015-07-15
Supplement: oncotarget-06-25466-s001.pdf [file oncotarget-06-25466-s001.pdf]

SUPPLEMENTARY FIGURES

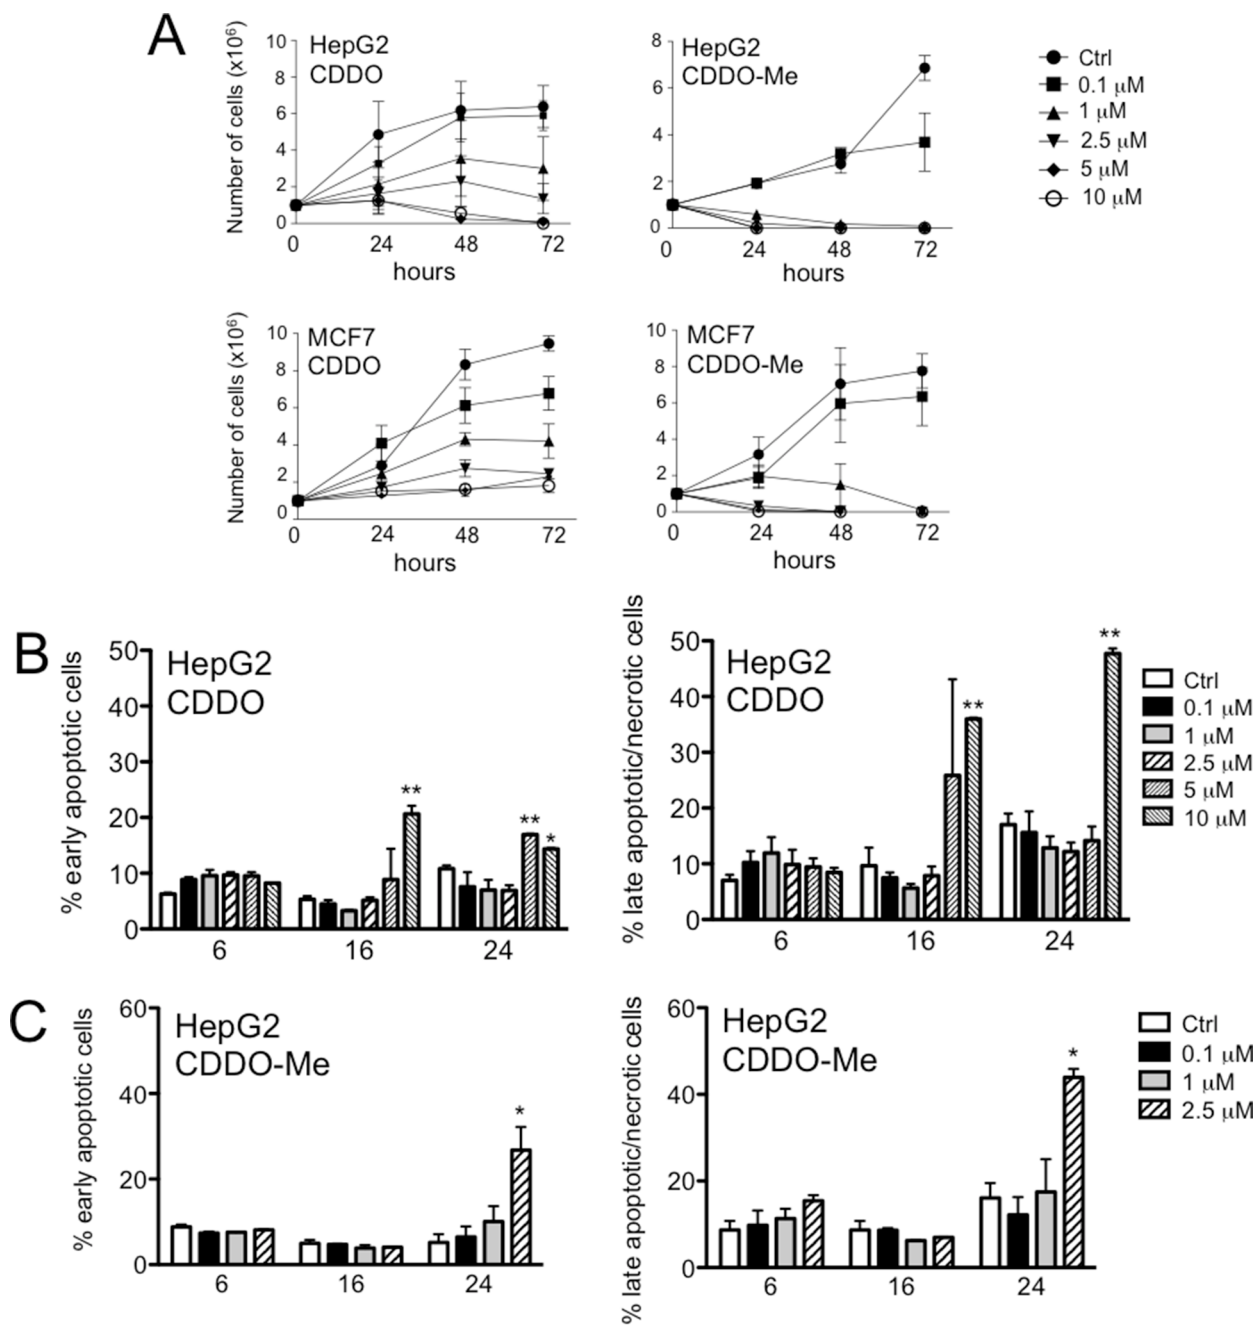

**Supplementary Figure S1: CDDO and CDDO-Me are anti-proliferative and induce apoptosis in HepG2 and MCF7 cells.** **A.** Growth curve of HepG2 and MCF7 cells incubated with the indicated concentrations of CDDO (left panel) and CDDO-Me (right panel) for up to 72 hours. Cells incubated with DMSO were used as controls (Ctrl). **B.** Percentage of early apoptotic cells and late apoptotic/necrotic cells after treatment with the indicated concentrations of CDDO for up to 24 hours. Values represent the mean ± SD of three independent experiments, \* $P < 0.05$  and \*\* $P < 0.01$  vs. Ctrl. **C.** Percentage of early apoptotic cells and late apoptotic/necrotic cells after treatment with the indicated concentrations of CDDO-Me for up to 24 hours. Values represent the mean ± SD of three independent experiments, \* $P < 0.05$  and \*\* $P < 0.01$  vs. Ctrl. (Continued)

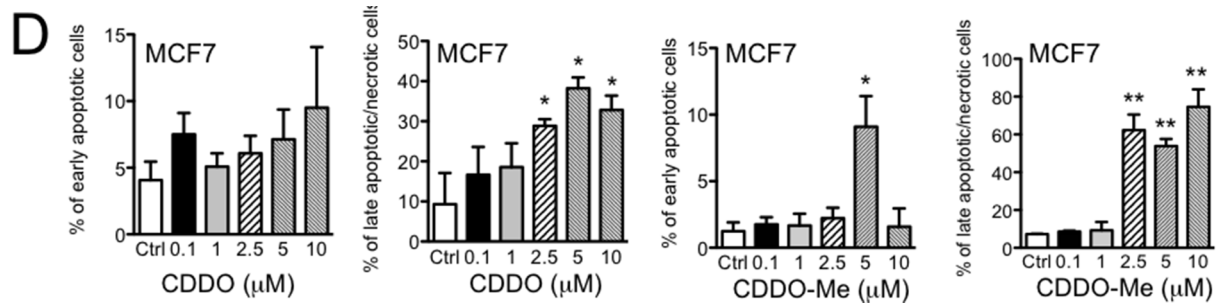

**Supplementary Figure S1: (Continued) CDDO and CDDO-Me are anti-proliferative and induce apoptosis in HepG2 and MCF7 cells. D.** Percentage of early apoptotic cells and late apoptotic/necrotic cells after treatment with the indicated concentrations of CDDO or CDDO-Me for 24 hours. Values represent the mean ± SD of three independent experiments, \* $P < 0.05$  and \*\* $P < 0.01$  vs. Ctrl.

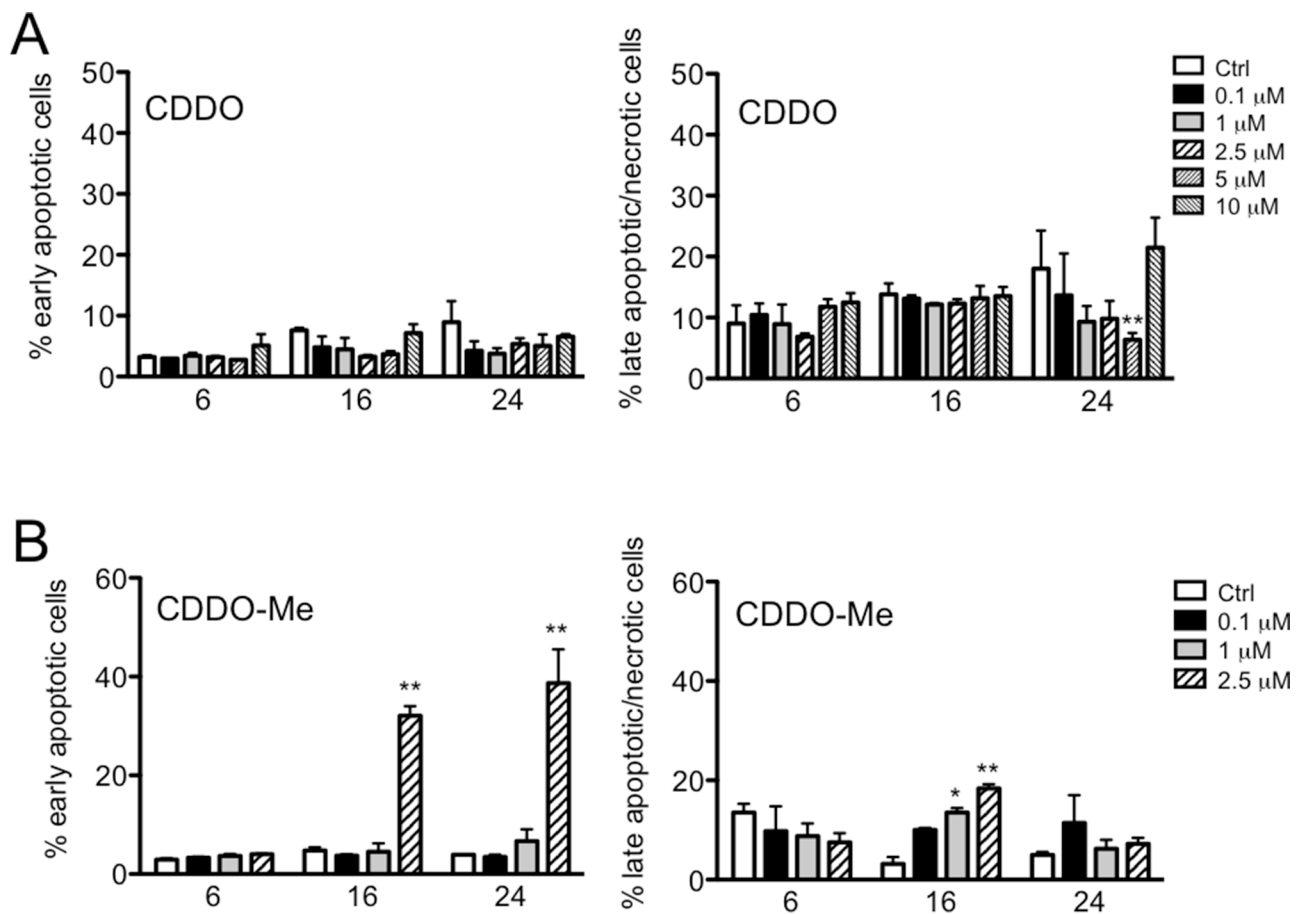

**Supplementary Figure S2: CDDO and CDDO-Me do not induce apoptosis in primary human fibroblasts. A.** Percentage of early apoptotic cells and late apoptotic/necrotic cells after treatment with CDDO for up to 24 hours. Values represent the mean ± SD of three independent experiments. \*\* $P < 0.01$  vs. Ctrl. **B.** Percentage of early apoptotic cells and late apoptotic/necrotic cells after treatment with CDDO-Me for up to 24 hours. Values represent the mean ± SD of three independent experiments, \* $P < 0.05$  and \*\* $P < 0.01$  vs. Ctrl.

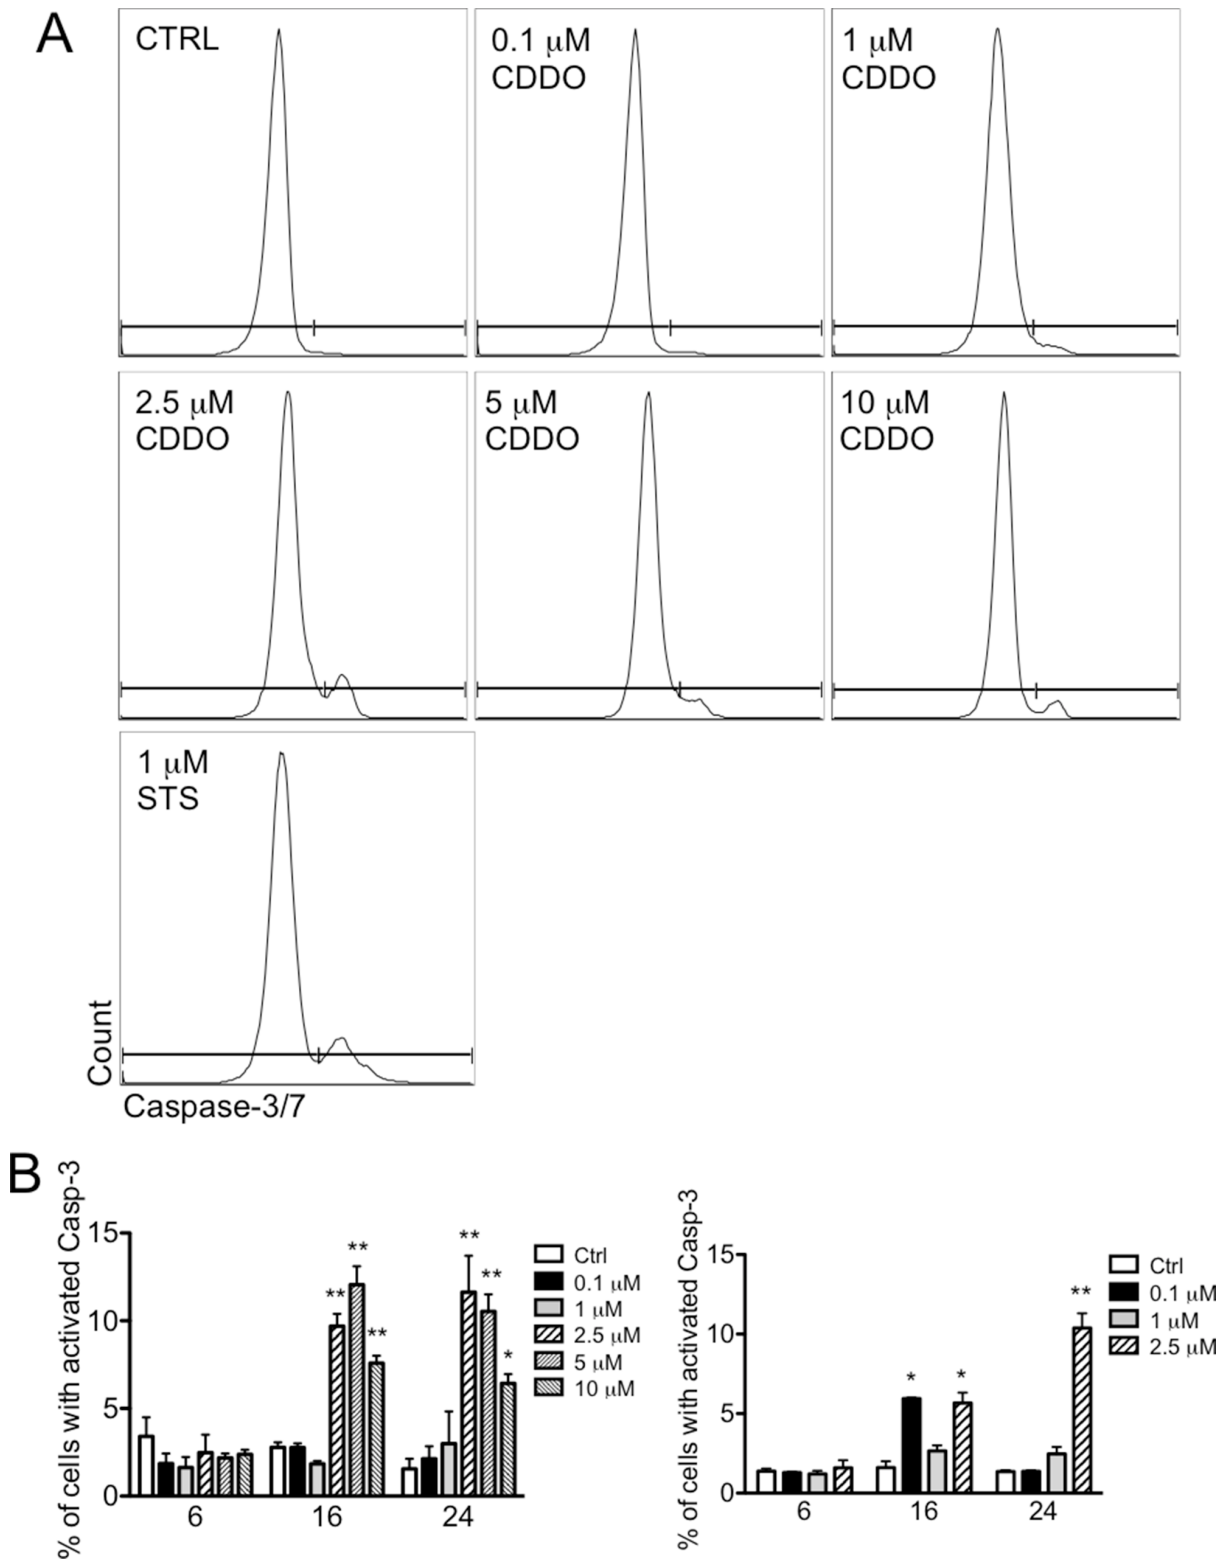

**Supplementary Figure S3: CDDO and CDDO-Me lead to activation of caspase-3/7.** **A.** Representative histograms showing CellEvent Caspase-3/7 Green Detection Reagent in RKO cells treated with increasing concentrations of CDDO, as revealed by flow cytometry. Cells treated with 1 μM staurosporine (STS) for 4 hours were used as positive control for caspase activation. **B.** Quantification of cells with activated caspase-3/7 after treatment with CDDO or CDDO-Me up to 24 hours. Data represent the mean ± SD of four independent experiments; \* $P < 0.05$  and \*\* $P < 0.01$  vs. Ctrl.

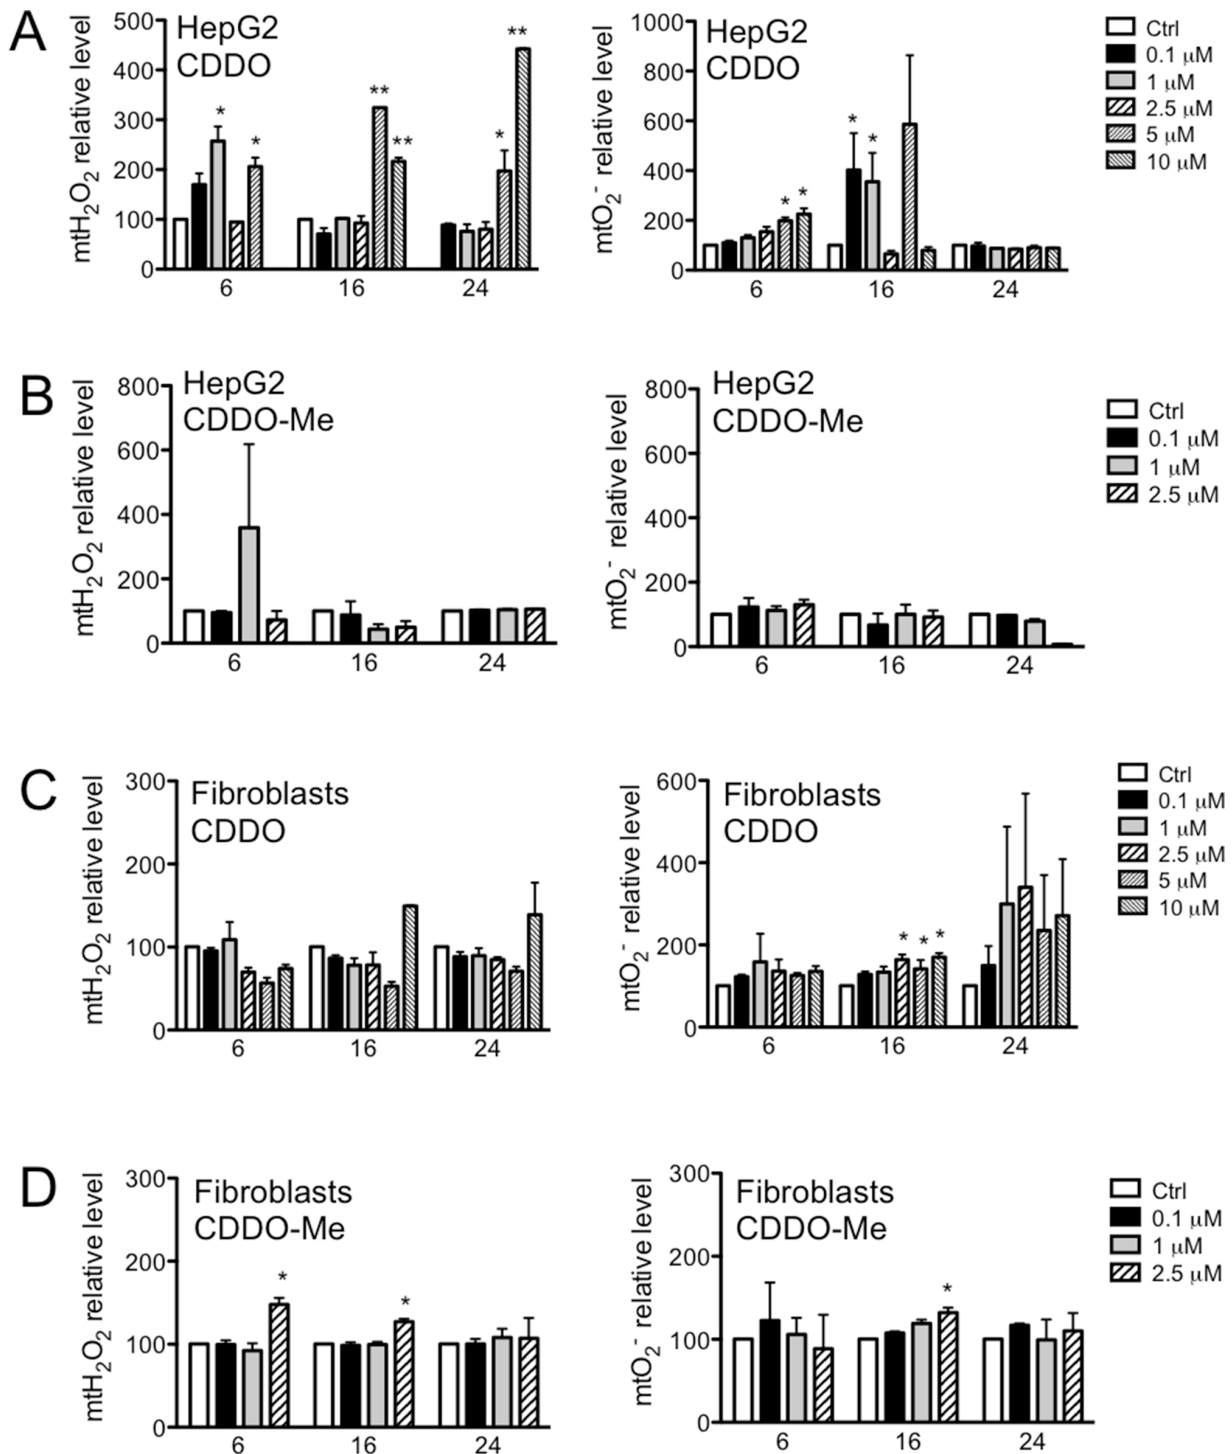

**Supplementary Figure S4: CDDO and CDDO-Me increase the levels of mitochondrial reactive oxygen species in HepG2 cells but not in primary fibroblasts.** A. Quantification of mitochondrial hydrogen peroxide ( $\text{mtH}_2\text{O}_2$ ) and mitochondrial anion superoxide ( $\text{mtO}_2^-$ ) in HepG2 cells treated with CDDO for up to 24 hours. Data are expressed as percentage of increase in median fluorescence intensity (MFI) and represent the mean  $\pm$  SD of three independent experiments; \* $P < 0.05$  and \*\* $P < 0.01$  vs. Ctrl. B. Quantification of  $\text{mtH}_2\text{O}_2$  and  $\text{mtO}_2^-$  in HepG2 cells treated with CDDO-Me for 6, 16 and 24 hours. Data are expressed as percentage of increase in MFI and represent the mean  $\pm$  SD of three independent experiments. C. Quantification of  $\text{mtH}_2\text{O}_2$  and  $\text{mtO}_2^-$  in primary cultures of fibroblasts treated with CDDO for up to 24 hours. Data are expressed as percentage of increase in MFI and represent the mean  $\pm$  SD of three independent experiments; \* $P < 0.05$  vs. Ctrl. D. Quantification of  $\text{mtH}_2\text{O}_2$  and  $\text{mtO}_2^-$  in primary cultures of fibroblasts treated with CDDO-Me for 6, 16 and 24 hours. Data are expressed as percentage of increase in MFI and represent the mean  $\pm$  SD of three independent experiments.

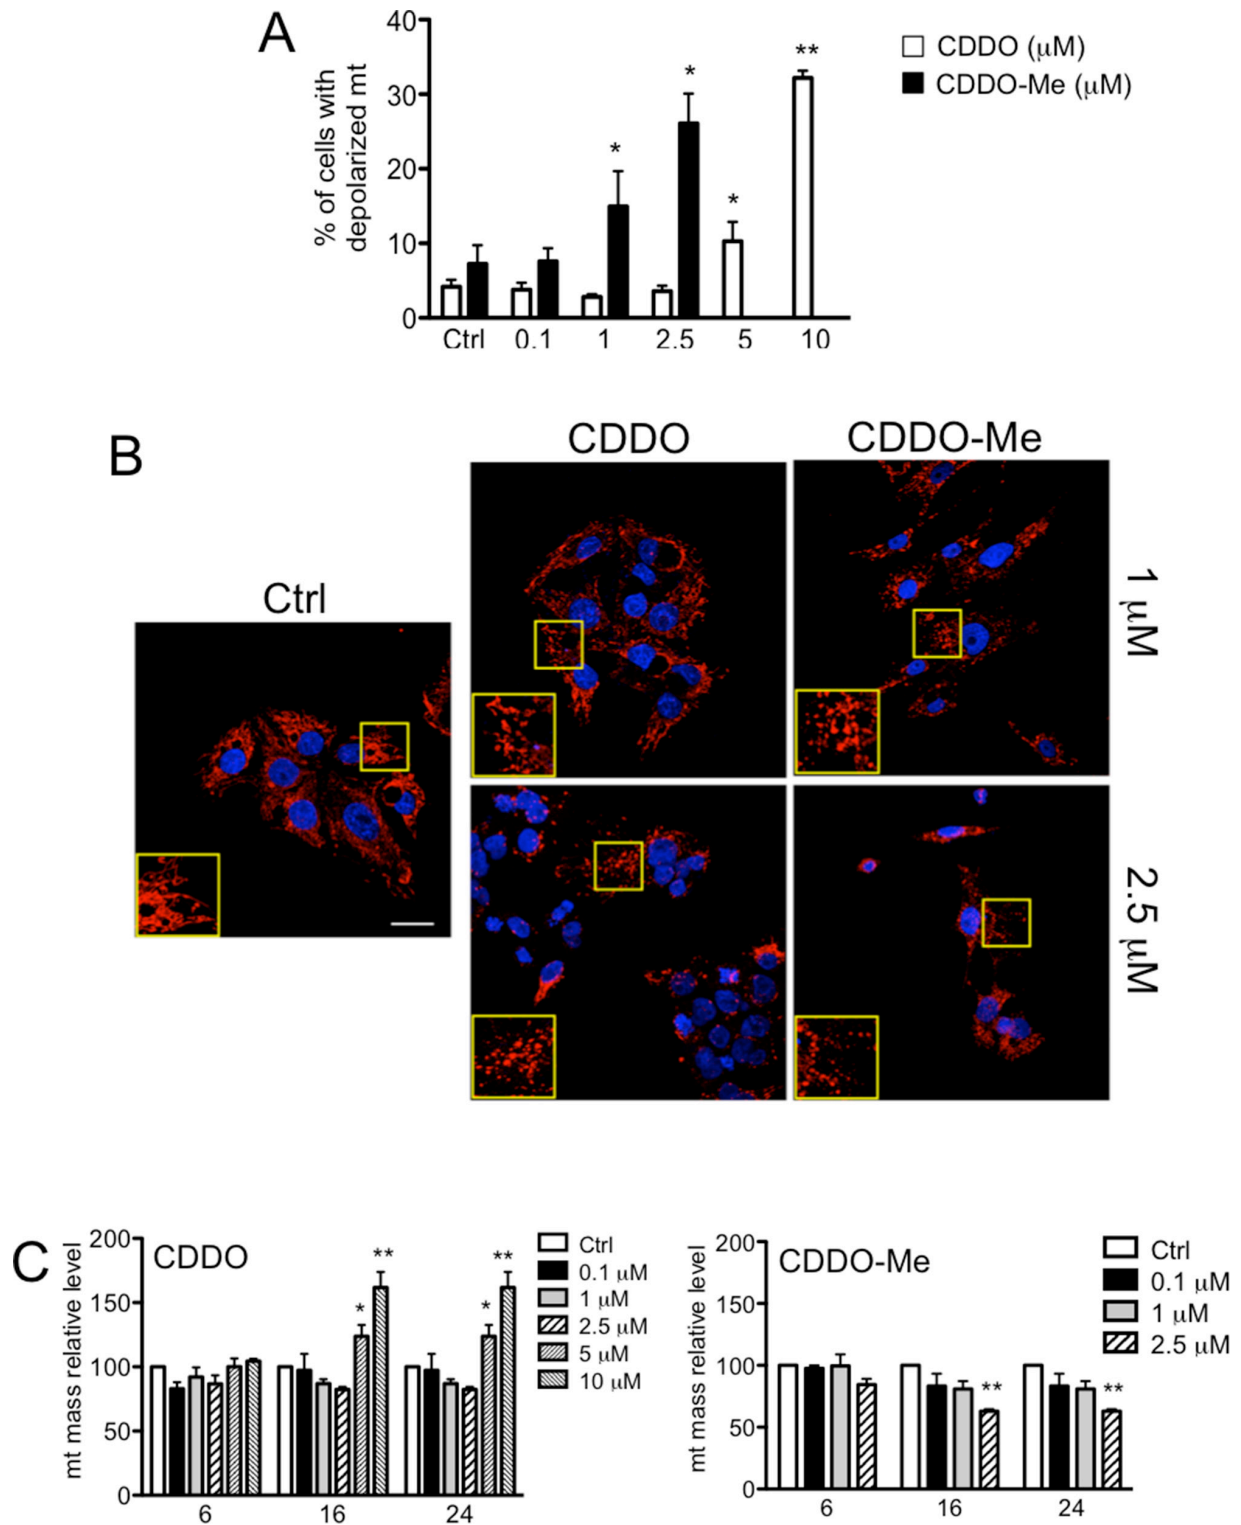

**Supplementary Figure S5: CDDO and CDDO-Me depolarize mitochondria and alter mitochondrial morphology in HepG2 cells.** **A.** Quantification of cells with depolarized mitochondria. Values represent the mean  $\pm$  SD of three independent experiments, \* $P < 0.05$  and \*\* $P < 0.01$  vs. Ctrl. **B.** Representative confocal microscopy images showing mitochondria in HepG2 cells treated with CDDO and CDDO-Me. Red fluorescence represents mitochondria labelled with anti-human mitochondrial protein and with goat anti-rabbit F(ab')<sub>2</sub> Alexa 647. Nuclei were counterstained with DAPI. **C.** Detection of mitochondrial mass in HepG2 cells treated with DMSO (Ctrl) and increasing concentrations of CDDO and CDDO-Me for up to 24 hours, as revealed by flow cytometry. Data are expressed as percentage of increase in MFI in comparison to Ctrl, set to 100%, and represent the mean  $\pm$  SD of four independent experiments; \* $P < 0.05$  and \*\* $P < 0.01$  vs. Ctrl.

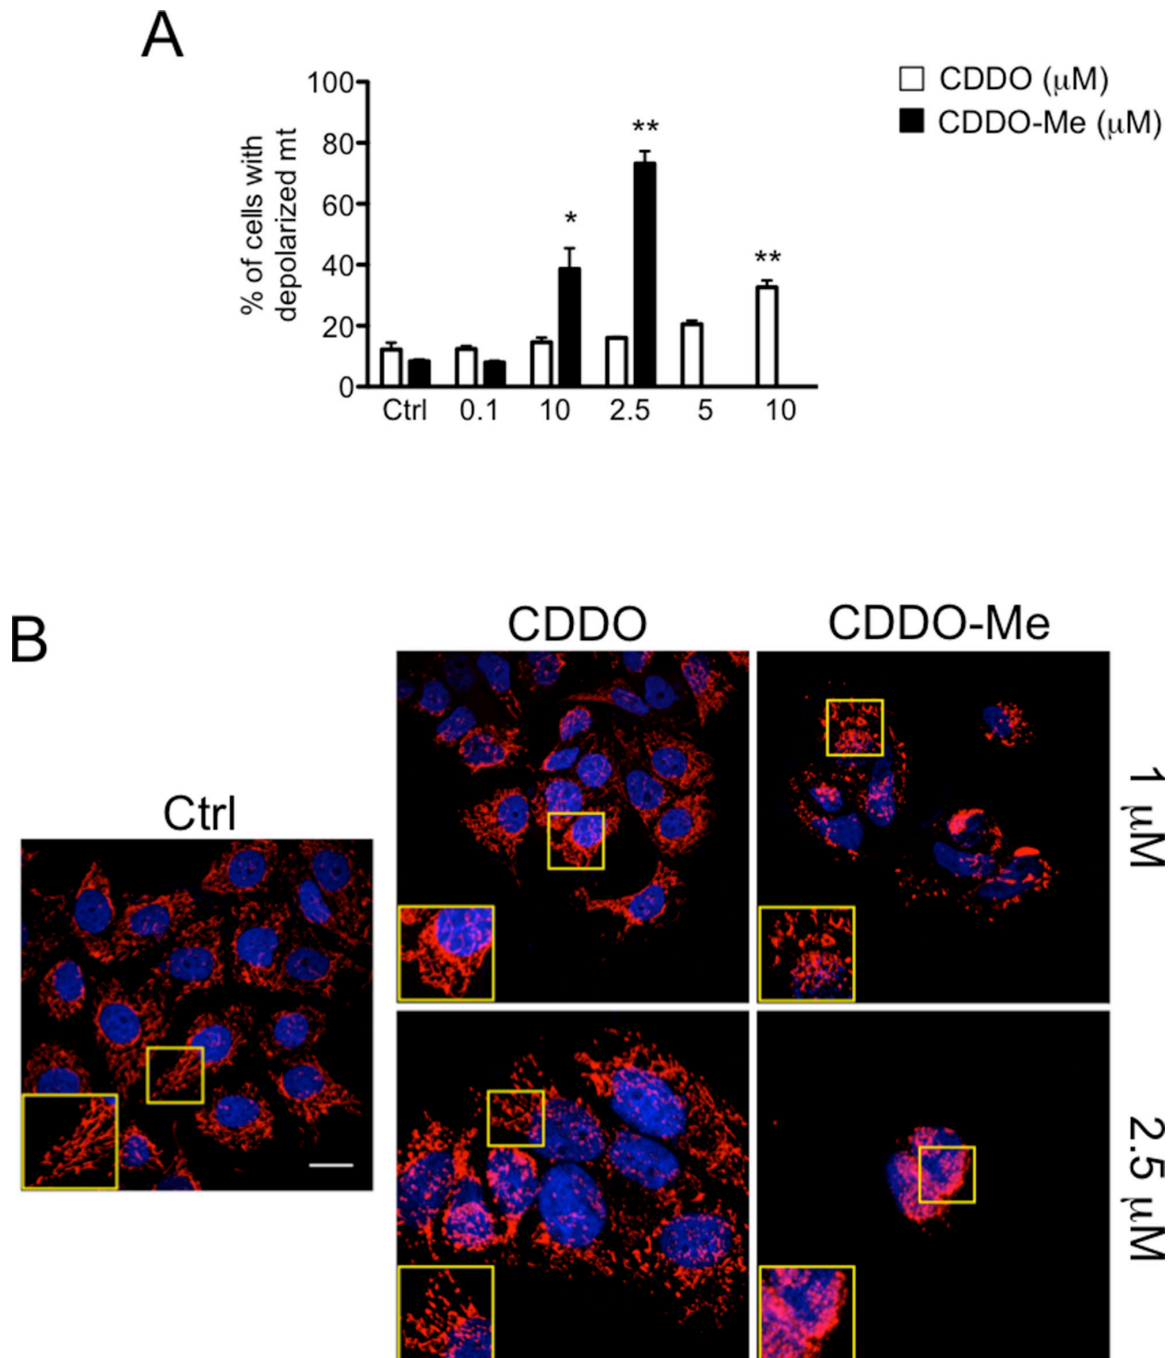

**Supplementary Figure S6: CDDO and CDDO-Me depolarize mitochondria and alter mitochondrial morphology in MCF7 cells.** **A.** Quantification of cells with depolarized mitochondria. Values represent the mean  $\pm$  SD of three independent experiments, \* $P < 0.05$  and \*\* $P < 0.01$  vs. Ctrl. **B.** Representative confocal microscopy images showing mitochondria in MCF7 cells treated with CDDO and CDDO-Me. Red fluorescence represents mitochondria labelled with anti-human mitochondrial protein and with goat anti-rabbit F(ab')<sub>2</sub> Alexa 647. Nuclei were counterstained with DAPI.

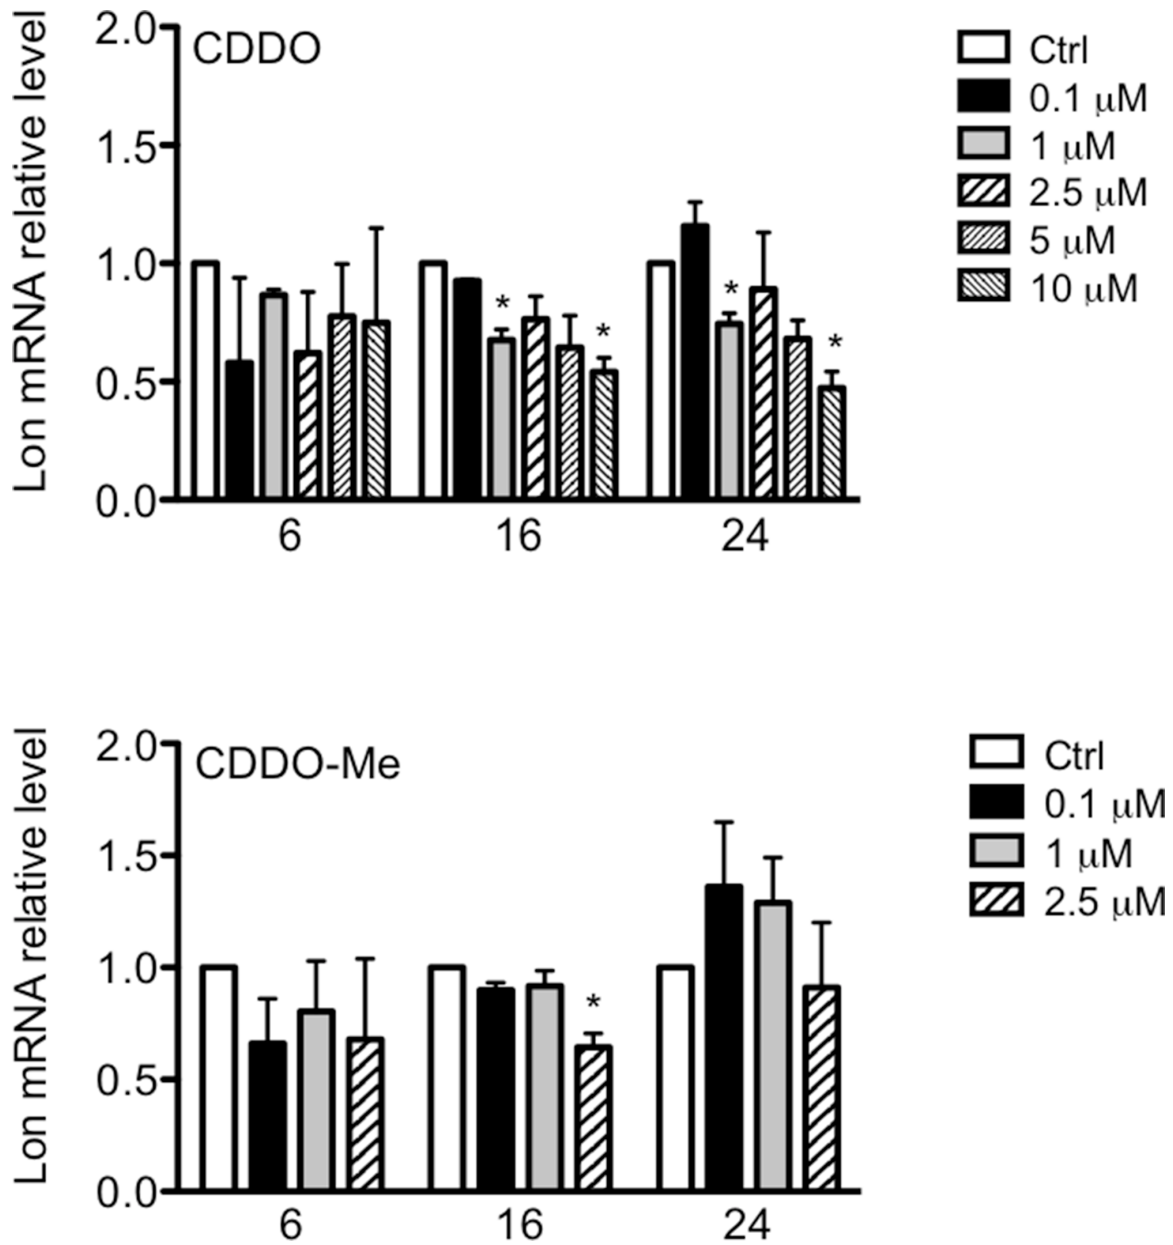

**Supplementary Figure S7: CDDO and CDDO slightly modulate mRNA levels of Lon.** Quantification of Lon mRNA in RKO cells treated with CDDO and CDDO-Me for up to 24 hours, as revealed by real time PCR. Data are expressed as the mean  $\pm$  SD of four independent experiments; \* $P < 0.05$  vs. Ctrl.
